# Supplementary material for: Circulating Haptoglobin and Metabolic Syndrome in Renal Transplant Recipients
Source: PubMed Central journal article supplement (PMC5660219; doi:10.1038/s41598-017-14302-2), 2017-10-27
Supplement: 41598_2017_14302_MOESM1_ESM.pdf [file 41598_2017_14302_MOESM1_ESM.pdf]

# Circulating Haptoglobin and Metabolic Syndrome in Renal Transplant Recipients

Isidor Minović<sup>1,2,3\*</sup>, Michele F Eisenga<sup>1</sup>, Ineke J Riphagen<sup>1</sup>, Else van den Berg<sup>1</sup>, Jenny Kootstra-Ros<sup>3</sup>, Anne-Roos S Frenay<sup>4</sup>, Harry van Goor<sup>4</sup>, Gerald Rimbach<sup>5</sup>, Tuba Esatbeyoglu<sup>5</sup>, Andy P Levy<sup>6</sup>, Carlo AJM Gaillard<sup>1</sup>, Johanna M Geleijnse<sup>7</sup>, Manfred L Eggersdorfer<sup>8</sup>, Gerjan J Navis<sup>1</sup>, Ido P Kema<sup>3</sup>, Stephan JL Bakker<sup>1,2</sup>

<sup>1</sup>Department of Internal Medicine, Division of Nephrology, University of Groningen, University Medical Center Groningen, Hanzeplein 1, 9700 RB, Groningen, the Netherlands;

<sup>2</sup>Top Institute Food and Nutrition, Nieuwe Kanaal 9-A, 6709 PA, Wageningen, the Netherlands;

<sup>3</sup>Department of Laboratory Medicine, University of Groningen, University Medical Center Groningen, Hanzeplein 1, 9700 RB, Groningen, the Netherlands;

<sup>4</sup>Department of Pathology, University of Groningen, University Medical Center Groningen, Hanzeplein 1, 9700 RB, Groningen, the Netherlands;

<sup>5</sup>Institute of Human Nutrition and Food Science, Christian-Albrechts-University of Kiel, Kiel, Germany;

<sup>6</sup>Faculty of Medicine, Technion Institute of Technology, Efron Street 1, Haifa, Israel;

<sup>7</sup>Division of Human Nutrition, Wageningen University, Droevendaalsesteeg 4, 6708 PB, Wageningen, the Netherlands;

<sup>8</sup>DSM Nutritional Products, Wurmisweg 576, 4303, Kaiseraugst, Switzerland.

## Supplementary Table 1. Baseline characteristics of 149 included healthy controls.

|                                  | Healthy controls<br>(n=149) |
|----------------------------------|-----------------------------|
| <b>Demographics</b>              |                             |
| Age, years                       | 52±10                       |
| Male gender, n (%)               | 159 (54)**                  |
| Weight, kg                       | 79±14                       |
| BMI, kg/m <sup>2</sup>           | 25.5 [23.7-28.3]            |
| BMI<21 kg/m <sup>2</sup> , n (%) | 8 (7)                       |

|                                               |                              |
|-----------------------------------------------|------------------------------|
| Waist circumference, cm                       | 96 [92-102]                  |
| Smoking status, n (%)                         |                              |
| Current                                       | 21 (21) <sup>***</sup>       |
| Past                                          | 21 (21) <sup>***</sup>       |
| Never                                         | 59 (58) <sup>***</sup>       |
| eGFR, mL/min/1.73m <sup>2</sup>               | 93±13 <sup>***</sup>         |
| Proteinuria, n (%)                            | 0 (0) <sup>#</sup>           |
| Thrombocytes, 10E9/L                          | 257±60 <sup>***</sup>        |
| MCV, fL                                       | 89.7±5.1                     |
| Total Hb, mmol/L                              | 8.8±0.8 <sup>***</sup>       |
| Parathyroid hormone, pmol/L                   | 3.3 [2.6-4.2] <sup>***</sup> |
| Venous pH                                     | 7.37±0.04                    |
| Venous HCO <sub>3</sub> <sup>-</sup> , mmol/L | 26.1±1.7 <sup>***</sup>      |
| Hp, g/L                                       | 1.1 [0.9-1.4] <sup>***</sup> |

#### **Dietary intake and nutritional status**

|                            |                             |
|----------------------------|-----------------------------|
| Total protein intake, g/d  | 88±24                       |
| Animal protein intake, g/d | 54±17                       |
| Plant protein intake, g/d  | 34±12                       |
| Energy intake, kCal/d      | 2338±773                    |
| Vitamin B12, pmol/L        | 253 [205-333] <sup>**</sup> |
| Vitamin B6, nmol/L         | 40 [29-60] <sup>***</sup>   |
| Folic acid, nmol/L         | 21 [16-27] <sup>**</sup>    |
| Serum albumin, g/L         | 45.4±2.7 <sup>***</sup>     |

#### **Cardiovascular parameters**

|                                     |                              |
|-------------------------------------|------------------------------|
| SBP, mmHg                           | 125±15 <sup>***</sup>        |
| DBP, mmHg                           | 76±9 <sup>***</sup>          |
| Heart rate, bpm                     | 66±9 <sup>*</sup>            |
| Use of antihypertensive drug, n (%) | 14 (15) <sup>***</sup>       |
| Hs-CRP, mg/L                        | 1.0 [0.5-2.2] <sup>***</sup> |
| Total cholesterol, mmol/L           | 5.5±1.2 <sup>***</sup>       |
| LDL-cholesterol, mmol/L             | 3.6 [2.9-4.4] <sup>***</sup> |
| Triglycerides, mmol/L               | 1.1 [0.8-1.7] <sup>***</sup> |
| Use of statin, n (%)                | 3 (3) <sup>***</sup>         |

|                                       |                               |
|---------------------------------------|-------------------------------|
| Hemolytic index>20, n (%)             | 14 (25) <sup>***</sup>        |
| Hp 1-1 genotype                       | 25 (24)                       |
| Hp 1-2 genotype                       | 55 (52)                       |
| Hp 2-2 genotype                       | 25 (24)                       |
| <b>Glucose homeostasis parameters</b> |                               |
| Serum glucose, mmol/L                 | 5.3 [5.1-5.6]                 |
| HbA <sub>1c</sub> , n (%)             | 5.6±0.3 <sup>***</sup>        |
| Diabetes, n (%)                       | 0 (0) <sup>#</sup>            |
| Use of antidiabetic drug, n (%)       | 0 (0) <sup>#</sup>            |
| <b>Liver function parameters</b>      |                               |
| ALAT, U/L                             | 19 [16-27]                    |
| ASAT, U/L                             | 23 [20-27]                    |
| Alkaline phosphatase, U/L             | 68 [58-79]                    |
| Gamma glutamyl transferase, U/L       | 19 [15-33] <sup>***</sup>     |
| <b>Antioxidant status parameters</b>  |                               |
| Plasma MDA, μmol/L                    | 1.7 [1.0-3.4] <sup>***</sup>  |
| Urinary MDA excretion, μmol/24h       | 8.5 [6.3-11.2] <sup>***</sup> |

---

BMI, body mass index; eGFR, estimated glomerular filtration rate; MCV, mean corpuscular volume; Hb, hemoglobin; Hp, haptoglobin; SBP, systolic blood pressure; DBP, diastolic blood pressure; hs-CRP, high-sensitivity C-reactive protein; LDL, low-density lipoprotein; ALAT, alanine aminotransferase; ASAT, aspartate aminotransferase; MDA, malondialdehyde. \*P<0.05, \*\*P<0.01, and \*\*\*P<0.001 compared to RTR. <sup>#</sup>Values could not be tested statistically.
